# Supplementary material for: An organic cathode for low-temperature processed, flexible ternary organic solar cells with high-performance
Source: Royal Society of Chemistry journal article supplement (doi:10.1039/d4cp02513j), 2024-01-01
Supplement: d4cp02513j1.pdf [file d4cp02513j1.pdf]

## Supporting Information for

# **An organic cathode for low-temperature processed, flexible ternary organic solar cells with high-performance†**

Xia Liu,<sup>a</sup> Lei Wang,<sup>b</sup> Xi Liu,<sup>a</sup> Shuangcui Li,<sup>c</sup> Zhihai Liu,<sup>a,\*</sup> and Ping Chen<sup>a,\*</sup>

<sup>a</sup>*School of Physics and Electronic Information, Yantai University, Yantai 264005, China. E-mails: [zhliu@ytu.edu.cn](mailto:zhliu@ytu.edu.cn) and [chenping@ytu.edu.cn](mailto:chenping@ytu.edu.cn)*

<sup>b</sup>*School of Artificial Intelligence, Beijing Technology and Business University, Beijing, 100048, China*

<sup>c</sup>*Institute of Intelligent Manufacturing and Elevator, Huzhou Vocational & Technical College, Huzhou, 313099, China*

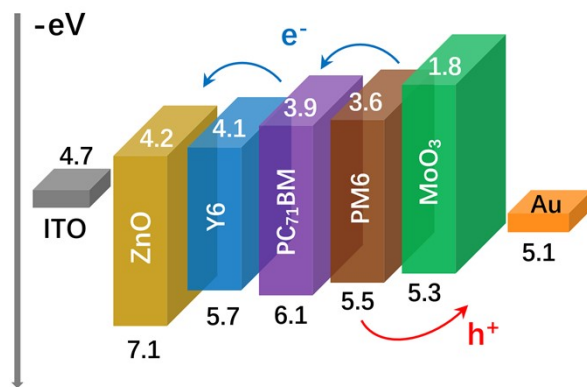

Figure S1. Energy level alignment of the functional layers involved in the control OSCs with a structure of ITO/ZnO/PM6:PC<sub>71</sub>BM:Y6/MoO<sub>3</sub>/Au.

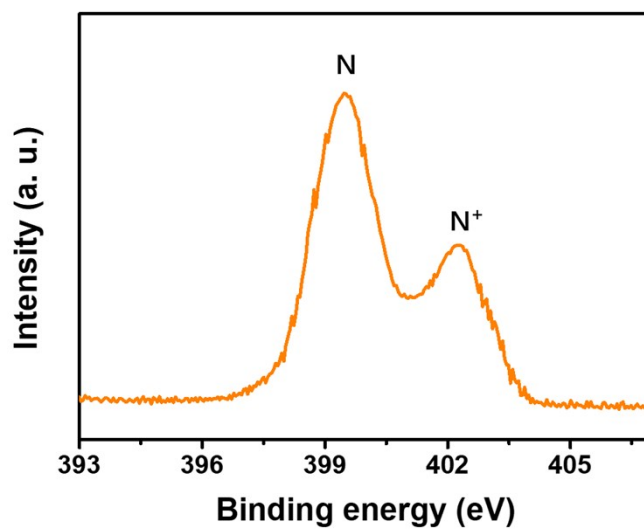

Figure S2. N1s response of the XPS spectrum for the PEDOT:PSS/PEIE electrode.

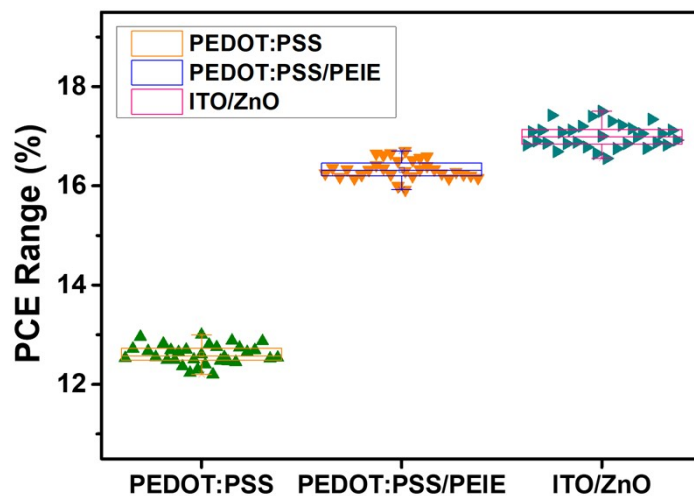

Figure S3. Statistical PCE distributions for 32 inverted OSCs based on bare PEDOT:PSS, PEDOT:PSS/PEIE and ITO/ZnO (control) at the cathode side.

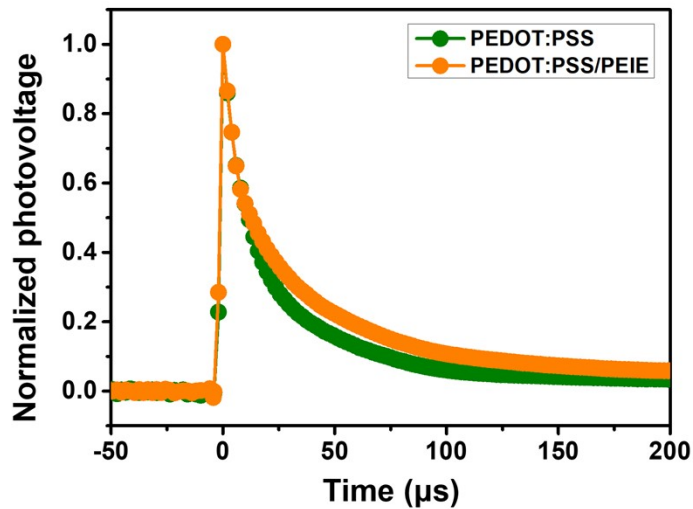

Figure S4. Transient photovoltage performance of the ternary OSCs using bare PEDOT:PSS or PEDOT:PSS/PEIE as the cathode.

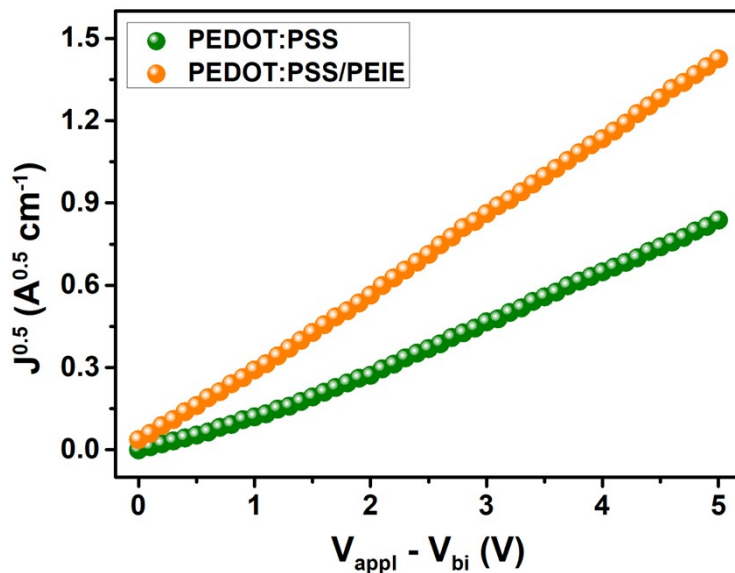

Figure S5.  $J$ - $V$  characteristics for the electron-only devices with electrodes of PEDOT:PSS and PEDOT:PSS/PEIE.

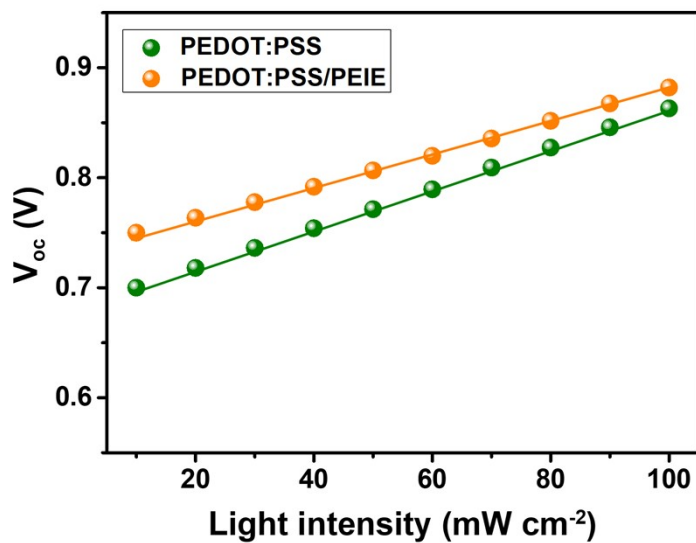

Figure S6. Light intensity dependence of  $V_{\text{oc}}$  of the OSCs using PEDOT:PSS and PEDOT:PSS/PEIE as the cathodes.

Table S1. Thickness and sheet resistance for as-casted PEDOT:PSS, acid treated PEDOT:PSS and ITO electrodes.

| Electrode              | Thickness (nm) | Sheet resistance ( $\Omega \text{ sq}^{-1}$ ) |
|------------------------|----------------|-----------------------------------------------|
| As-casted PEDOT:PSS    | 50             | 1081                                          |
| Acid treated PEDOT:PSS | 47             | 83                                            |
| ITO                    | 185            | 20                                            |

### Electron mobility measurement

The electron mobility was measured following the space-charge limited current approach. The electron-only device was fabricated using the following architecture [PEDOT:PSS or PEDOT:PSS/PEIE/PM6:PC<sub>71</sub>BM:Y6/LiF/Al]. The  $J$ - $V$  characteristics for electron-only devices were measured in dark conditions. The mobility was calculated from the  $J$ - $V$  characteristics following Mott-Gurney law:<sup>1</sup>

$$J = \frac{9\epsilon_0\epsilon_r\mu(V - V_{bi})^2}{8L^3} \quad (1)$$

where  $J$  is the current density,  $\epsilon_0$  is the permittivity of free space,  $\epsilon_r$  is the relative dielectric constant of the organic active layer,  $V$  is the applied voltage,  $V_{bi}$  is the built-in voltage,  $\mu$  is the electron mobility, and  $L$  is the thickness of the active layer.

### Reference

1 Y. Sun, J. H. Seo, C. J. Takacs, J. Seifert, and A. J. Heeger, *Adv. Mater.* 2011, **23**, 1679–1683.
